# Supplementary material for: Elucidating the role of nicotinamide N-methyltransferase-p53 axis in the progression of chronic kidney disease
Source: PeerJ. 2023 Nov 8;11:e16301. doi: 10.7717/peerj.16301 (PMC10638915; doi:10.7717/peerj.16301)
Supplement: Supplemental Information 2 [file peerj-11-16301-s002.xlsx]

## Sheet: Figure1
Figure1A,D							Figure1C
	NNMT	FN	TenascinC	collagenI	α-SMA			NNMT
Control	0.999998	1	1	1	0.999999		Control	0.901
Control	1	1	0.999999	0.999999	1		Control	1
Control	0.999997	0.999991	1.00001	0.999993	1		Control	1.414
Control	0.999986	1	1.00002	0.999995	0.99999		Control	0.956
Control	1	1	1	1	0.999998		Control	1
UUO3d	1.17157	3.84247	3.00028	2.62192	3.52372		UUO3d	14.516
UUO3d	2.21754	2.64724	2.53377	2.26862	3.9968		UUO3d	11.198
UUO3d	1.53688	2.68621	3.44682	2.12054	4.19953		UUO3d	12.736
UUO3d	2.48405	1.22769	1.25987	2.76565	3.40589		UUO3d	13.784
UUO3d	1.31989	2.58252	1.3779	3.16325	3.86842		UUO3d	13.755
UUO7d	3.65343	5.32875	5.84274	3.6581	6.63423		UUO7d	20.456
UUO7d	3.384	4.86359	5.01368	4.17696	5.40935		UUO7d	13.715
UUO7d	3.27091	5.59994	6.90138	4.51752	6.82549		UUO7d	8.59
UUO7d	4.33212	6.90218	6.78817	4.21768	6.28281		UUO7d	48.039
UUO7d	4.08154	7.92979	8.07168	6.80783	6.83433		UUO7d	18.689
UUO10d	6.47127	7.72263	6.67057	6.17681	6.70204		UUO10d	40.075
UUO10d	6.47304	8.54045	11.2625	5.27956	8.48479		UUO10d	49.352
UUO10d	7.28766	5.7192	9.85215	6.24135	6.57599		UUO10d	28.349
UUO10d	7.74441	7.83159	6.43458	6.73959	6.58735		UUO10d	28.757
UUO10d	4.80561	7.09503	11.9447	6.91291	7.21503		UUO10d	25.079
UUO14d	5.90551	8.35789	8.26802	6.53626	9.22602		UUO14d	60.636
UUO14d	7.2642	7.2978	7.65853	7.60405	10.1852		UUO14d	62.384
UUO14d	7.60099	9.55398	17.2025	7.12496	8.29037		UUO14d	43.373
UUO14d	5.3944	9.7569	12.5951	7.14916	7.10552		UUO14d	22.341
UUO14d	5.3015	6.63742	13.0687	8.28572	7.81905		UUO14d	38.249

## Sheet: Figure3
Figure3A,D								Figure3C			Figure3G					Figure3I			Figure3F
	FN	collagenI			α-SMA	NNMT			NNMT			NNMT	α-SMA	TenascinC			CTGF			NNMT
TGF-β0ng/ml	0.999879	0.999999		TGF-β0ng/ml	1.00444	1		TGF-β0ng/ml	1.222		control	0.999996	1	1.027		control	1		si-NC	1
TGF-β0ng/ml	1	1		TGF-β0ng/ml	0.999998	0.999999		TGF-β0ng/ml	1		control	1	1	0.999992		control	1		si-NC	1
TGF-β0ng/ml	1	1		TGF-β0ng/ml	1.00001	1		TGF-β0ng/ml	1.116		control	1	1	1.00001		control	1		si-NC	1
TGF-β0ng/ml	1	0.999999		TGF-β1ng/ml	2.29156	1.37343		TGF-β1ng/ml	1.588		TGF-β10ng/ml	1.79165	1.43515	2.43349		TGF-β10ng/ml	1.41		si-NNMT	0.166
TGF-β1ng/ml	2.21219	0.813782		TGF-β1ng/ml	1.76532	1.56482		TGF-β1ng/ml	1.385		TGF-β10ng/ml	1.36108	2.57595	3.72141		TGF-β10ng/ml	1.37		si-NNMT	0.283
TGF-β1ng/ml	2.5498	1.69641		TGF-β1ng/ml	3.66575	1.38152		TGF-β1ng/ml	1.559		TGF-β10ng/ml	1.25762	1.7807	3.49127		TGF-β10ng/ml	3.699		si-NNMT	0.086
TGF-β1ng/ml	3.08414	1.69653		TGF-β2ng/ml	2.15267	1.32883		TGF-β2ng/ml	1.535		si-NC	1.55926	1.38356	1.46221		si-NC	0.739
TGF-β1ng/ml	2.00651	0.708332		TGF-β2ng/ml	2.04719	1.58675		TGF-β2ng/ml	1.467		si-NC	0.807157	0.57106	0.879424		si-NC	0.855
TGF-β2ng/ml	3.0073	0.929751		TGF-β2ng/ml	2.88122	1.26639		TGF-β2ng/ml	1.369		si-NC	0.695316	0.753061	1.06633		si-NC	1.495
TGF-β2ng/ml	2.27357	2.122		TGF-β5ng/ml	5.87002	1.88997		TGF-β5ng/ml	1.423		si-NNMT	0.852665	1.21252	1.54966		si-NNMT	1.137
TGF-β2ng/ml	2.85212	1.41441		TGF-β5ng/ml	2.68677	1.89285		TGF-β5ng/ml	1.402		si-NNMT	1.00735	0.7303	1.26584		si-NNMT	0.804
TGF-β2ng/ml	1.97224	0.761305		TGF-β5ng/ml	5.99294	1.75356		TGF-β5ng/ml	1.422		si-NNMT	0.363803	0.743591	1.13353		si-NNMT	1.342
TGF-β5ng/ml	4.9326	1.5144		TGF-β10ng/ml	5.97791	2.31158		TGF-β10ng/ml	1.621		TGF-β10ng/ml+si-NC	2.10384	2.15551	3.87614		TGF-β10ng/ml+si-NC	1.525
TGF-β5ng/ml	2.90239	2.68686		TGF-β10ng/ml	1.99913	2.16707		TGF-β10ng/ml	1.359		TGF-β10ng/ml+si-NC	1.55429	2.34322	4.19488		TGF-β10ng/ml+si-NC	1.886
TGF-β5ng/ml	3.55644	1.76015		TGF-β10ng/ml	4.46125	2.30886		TGF-β10ng/ml	1.602		TGF-β10ng/ml+si-NC	1.5724	1.53629	5.39193		TGF-β10ng/ml+si-NC	1.779
TGF-β5ng/ml	1.87182	1.15262		TGF-β20ng/ml	5.02144	2.51247		TGF-β20ng/ml	1.757		TGF-β10ng/ml+si-NNMT	0.613273	1.227	2.47076		TGF-β10ng/ml+si-NNMT	1.38
TGF-β10ng/ml	4.7306	1.51385		TGF-β20ng/ml	2.37819	2.54751		TGF-β20ng/ml	2.443		TGF-β10ng/ml+si-NNMT	0.998215	1.55598	2.8616		TGF-β10ng/ml+si-NNMT	1.18
TGF-β10ng/ml	2.94382	3.89438		TGF-β20ng/ml	5.83187	1.64209		TGF-β20ng/ml	1.563		TGF-β10ng/ml+si-NNMT	0.646911	0.95247	3.6957		TGF-β10ng/ml+si-NNMT	1.184
TGF-β10ng/ml	2.98559	1.29781
TGF-β10ng/ml	2.87345	1.50548
TGF-β20ng/ml	4.71796	1.61649
TGF-β20ng/ml	3.67053	1.48447
TGF-β20ng/ml	2.94013	1.78511

## Sheet: Figure4
Figure4B			Figure4C			Figure4D			Figure4E
	Sirius red			Masson			NNMT			NNMT
control	0.371415		control	0.3149		control	1.73453		control	1
control	0.21786		control	0.4729		control	1.06276		control	1
control	0.154003		control	0.4034		control	1.13684		control	1
control	0.369057		control	0.033755		control	1.17954		control	1
control	0.202034		control	0.041965		NAM	1.50694		control	1
NAM	0.233328		NAM	0.7198		NAM	1.17064		NAM	1.581
NAM	0.244724		NAM	1.667		NAM	1.36762		NAM	1.065
NAM	0.258521		NAM	0.2778		NAM	1.12146		NAM	1.381
NAM	0.151729		NAM	0.098849		UUO	3.47203		NAM	1.098
NAM	0.131774		NAM	0.106342		UUO	2.12621		NAM	1.009
UUO	3.59766		UUO	4.0119		UUO	3.096		UUO	37.381
UUO	2.61977		UUO	7.6504		UUO	1.60032		UUO	54.889
UUO	2.16489		UUO	5.6888		UUO+NAM	2.01072		UUO	42.62
UUO	4.02287		UUO	10.3842		UUO+NAM	1.9635		UUO	45.26
UUO	3.04191		UUO	4.4991		UUO+NAM	1.36334		UUO	49.865
UUO+NAM	1.59956		UUO	3.7538		UUO+NAM	1.36334		UUO+NAM	21.276
UUO+NAM	1.84308		UUO+NAM	1.7704					UUO+NAM	18.262
UUO+NAM	1.17352		UUO+NAM	4.3871					UUO+NAM	39.492
UUO+NAM	1.82053		UUO+NAM	3.3488					UUO+NAM	23.688
UUO+NAM	2.25345		UUO+NAM	2.6338					UUO+NAM	28.7666
UUO+NAM	1.73738		UUO+NAM	3.5589
			UUO+NAM	2.0387

## Sheet: Figure5
Figure5A								Figure5B
	NNMT			FN	collagenI	α-SMA			NNMT	FN	collagenI	α-SMA
control	0.03858		control	0.770339	0.133237	0.244929		NAM0mM+TGF-β0ng/ml	1	1	0.999998	1
control	0.065247		control	0.506297	0.116487	0.217319		NAM0mM+TGF-β0ng/ml	0.999999	1	1.00001	1
control	0.165079		control	1.39545	0.177778	0.136621		NAM0mM+TGF-β0ng/ml	1	0.999999	0.999999	0.999999
control	0.129032		control	0.75652	0.127576	0.25682		NAM1mM+TGF-β0ng/ml	0.858447	0.462299	0.328336	1.09136
control	0.265036		control	0.6576	0.16553	0.2626		NAM1mM+TGF-β0ng/ml	0.929883	0.68462	0.697416	0.88031
NAM	0.047575		NAM	0.893386	0.083011	0.097676		NAM1mM+TGF-β0ng/ml	1.04616	0.29718	0.534924	1.22223
NAM	0.061813		NAM	0.570344	0.104073	0.179306		NAM5mM+TGF-β0ng/ml	0.642783	0.304961	0.617666	1.44537
NAM	0.218855		NAM	0.908675	0.128834	0.182257		NAM5mM+TGF-β0ng/ml	1.10155	0.275895	1.70348	0.94803
NAM	0.259675		NAM	0.65681	0.19449	0.073008		NAM5mM+TGF-β0ng/ml	0.588898	0.241922	0.665285	0.945382
NAM	0.216031		NAM	1.17647	0.18019	0.076847		NAM10mM+TGF-β0ng/ml	0.885024	0.239936	0.721762	1.06848
UUO	0.181317		UUO	2.56819	0.320049	4.73839		NAM10mM+TGF-β0ng/ml	1.32017	0.31562	1.26017	0.72055
UUO	0.302148		UUO	3.25147	0.484848	4.11911		NAM10mM+TGF-β0ng/ml	0.859253	0.262217	0.721099	0.447583
UUO	0.424125		UUO	4.44187	0.373149	4.97637		NAM20mM+TGF-β0ng/ml	1.12013	0.272529	1.2555	0.686792
UUO	0.691964		UUO	2.38023	0.681217	4.30481		NAM20mM+TGF-β0ng/ml	1.20131	1.75117	1.5255	0.72689
UUO	0.921569		UUO	2.1006	0.799137	4.05195		NAM20mM+TGF-β0ng/ml	0.601215	0.25069	0.543163	0.282172
UUO+NAM	0.127273		UUO+NAM	2.60206	0.232171	1.768		NAM0mM+TGF-β10ng/ml	1.27653	5.97565	4.13075	2.31158
UUO+NAM	0.15427		UUO+NAM	1.57234	0.143433	1.28917		NAM0mM+TGF-β10ng/ml	1.67567	6.87615	3.4068	2.13841
UUO+NAM	0.164666		UUO+NAM	1.90638	0.098512	2.82646		NAM0mM+TGF-β10ng/ml	1.21227	4.04771	3.57658	1.41337
UUO+NAM	0.548929		UUO+NAM	1.33796	0.368333	2.36628		NAM1mM+TGF-β10ng/ml	0.965824	5.23606	3.19502	1.73692
UUO+NAM	0.19697		UUO+NAM	2.01515	0.17231	2.56944		NAM1mM+TGF-β10ng/ml	1.46052	4.98536	2.27942	1.8622
								NAM1mM+TGF-β10ng/ml	1.32848	4.84238	3.16822	0.950363
								NAM5mM+TGF-β10ng/ml	0.586468	4.25612	2.38162	1.11934
								NAM5mM+TGF-β10ng/ml	1.23685	3.90693	1.22968	1.13526
								NAM5mM+TGF-β10ng/ml	0.961444	3.8014	3.09292	1.46917
								NAM10mM+TGF-β10ng/ml	0.779886	2.33878	1.64287	1.64837
								NAM10mM+TGF-β10ng/ml	0.812436	1.23981	1.83603	1.0162
								NAM10mM+TGF-β10ng/ml	0.850211	3.29316	2.87379	0.757541
								NAM20mM+TGF-β10ng/ml	0.592734	1.16348	0.652084	1.03068
								NAM20mM+TGF-β10ng/ml	0.851508	0.73249	0.873113	0.70886
								NAM20mM+TGF-β10ng/ml	0.666848	2.4708	0.953294	0.444693

## Sheet: Figure6
Figure6B			Figure6D
	p-p53/p53			pan-me p53/p53
control	0.487123		control	0.392857
control	0.559282		control	0.478841
control	0.287601		control	0.364372
control	0.207811		control	0.62807
control	0.224439		UUO	0.26569
control	0.217485		UUO	0.240521
NAM	0.544559		UUO	0.256826
NAM	0.367816		UUO	0.394148
NAM	0.551724		UUO+NAM	0.876758
NAM	0.349417		UUO+NAM	1.02488
NAM	0.22393		UUO+NAM	0.852959
NAM	0.279819		UUO+NAM	0.788148
UUO	0.703448
UUO	0.862069
UUO	1.20535
UUO	0.881296
UUO	0.84588
UUO	1.18622
UUO+NAM	0.368037
UUO+NAM	0.501878
UUO+NAM	0.425287
UUO+NAM	0.156409
UUO+NAM	0.207939
UUO+NAM	0.160124
